# Supplementary material for: CRISPR/Cas9 Knock-Out in Primary Neonatal and Adult Cardiomyocytes Reveals Distinct cAMP Dynamics Regulation by Various PDE2A and PDE3A Isoforms
Source: MDPI journal article supplement (doi:10.3390/cells12111543), 2023-06-04
Supplement: s1 [file s1]

LOCUS pDNR221\_cas9 4608 bp ds-DNA circular 13-DEC-2016  
FEATURES Location/Qualifiers

misc\_feature 569..668  
/note="aatL1"  
gene 6760..7569  
/note="kanamycin resistance gene"  
rep\_origin 7690..8363  
/note="ColE1 (pUC-type) origin of replication"  
misc\_feature 6491..6590  
/note="attL2"  
terminator 726..857  
/label=SV40\_PA\_terminator  
repeat\_region 718..852  
/note=""  
terminator 866..997  
/label=SV40\_PA\_terminator  
repeat\_region 853..992  
/note=""  
terminator 1006..1137  
/label=SV40\_PA\_terminator  
repeat\_region 993..1132  
/note=""  
promoter 1199..1864  
/label=CMV\_immearely\_promoter  
misc\_feature 1278..1565  
/label=CAG\_enhancer  
source 1890..1895  
/organism="hCas9"  
/mol\_type="other DNA"  
CDS 1896..6038  
/note="cas9 DAPCEL optimised"  
/translation="MDKKYSIGLDIGTNSVGWAVITDEYKVPSKKFKVLGNTDRHSIK  
KNLIGALLFDSGETAEATRLKRTARRRYTRRKNRICYLQEIFSNEMAKVDDSFHRL  
ESFLVEEDKKHERHPIFGNIVDEVAYHEKYPTIYHLRKKLV DSTKADLR LIYLALAH  
MIKFRGHFLIEGDLNPDNSDVKLF IQLVQTYNQ LFEENPINASGVDAKILSARLSK  
SRLENLIAQLPGEKKNGLFGNLIALSLGLTPNFKS NFDLAEDAKLQLSKD TYDDDL  
NLLAQIGDQYADLFLAAKNLSDAILLSDILRVNTEITKAPLSASMIKRYDEHHQDLTL  
LKALVRQQLPEKYKEIFFDQSKNGYAGYIDGGASQEEFYKFIKPILEKMDGTEELLVK  
LNREDLLRKQRTFDNGSIPHQIHLGELHAILRRQEDFYFPFLKDNREKIEKILTFRI  
PYVVGPLARGNSRFAWMTRKSEETITPWNFEVVDKGASAQSFIERMTNFDKNLPNEKVL  
PKHSLLYEYFTVYNELTKVKYVTEGMRKPAFLSGEQKKAIVDLLFKTNRKVTVKQLKE  
DYFKKIECFDSVEISGVEDRFNASLGTYHDLKI IKDKDFLDNEENEDILEDIVLTLT  
LFEDREMIEERLKTYAHLFDDKVMKQLKRRRYTGWGRLSRKLINGIRDKQSGKTILDF  
LKSDGFANRNFQMQLIHDDSLTFKEDIQKAQVSGQGDSLHEHIANLAGSPAIKKGILQT  
VKVVDLVKVMGRHKPENIVIAMARENQTTQKGQKNSRERMKRIE EGikelGSQILKE  
HPVENTQLQNEKLYLYYLQNGRDMYVDQELDINRLSDYDVDHIVPQSFLKDDSIDNKV  
LTRSDKNRGKSDNVPSEEVVKKMKNYWRQLLNAKLITQRKFDNLTKAERGGLSEL  
DKAGFIKRLVETRQITKHVAQILDSRMNTKYDENDKLIREVKVITLKS LVSDFRKDFQF  
YKVR EINNYHHAHDAYLNAVVG TALIKKYPKLESEFVYGDYKVYDVRKMI AKSEQ  
EIGKATAKYFFYSNIMNFFKTEITLANGEIRKRPLIETNGETGEIVWDKGRDFATVRK  
VLSMPQVNIVKKTEVQTGGFSKESILPKRNSDKLIARKKDWDPKKYGGFDSPTVAYS  
SVLVVAKVEKGKSKKLKSVKELLGITIMERS SFEKNPIDFLEAKGYKEVKDLIIKLPK  
YSLELENGRKRMLASAGELQKGNELALPSKYVNFLYLASHYEKLKGS PEDNEQKQLF  
VEQHKHYLDEIIIEQISEFSKR VILADANLDKVL SAYNKH RDKPIREQAENIIHLFT  
LTNLGA PAAFKYFDTTIDRKRYTSTKEVLDATLIHQ SITGLYETRIDLSQLGGDS  
RADPKKKRK V."

misc\_feature 6012..6032  
/note="SV40 NLS"  
misc\_feature 6018..6032

terminator /note="NLS"  
6077..6347  
/label=TK\_PA\_terminator

ORIGIN

```
1 CTTTCCTGCG TTATCCCCTG ATTCTGTGGA TAACCGTATT ACCGCCTTTG AGTGAGCTGA
61 TACCGCTCGC CGCAGCCGAA CGACCGAGCG CAGCGAGTCA GTGAGCGAGG AAGCGGAAGA
121 GCGCCAATA CGCAAACCGC CTCTCCCCGC GCGTTGGCCG ATTCATTAAT GCAGCTGGCA
181 CGACAGGTTT CCCGACTGGA AAGCGGGCAG TGAGCGCAAC GCAATTAATA CGCGTACCGC
241 TAGCCAGGAA GAGTTTGTAG AAACGCAAAA AGGCCATCCG TCAGGATGGC CTTCTGCTTA
301 GTTTGATGCC TGGCAGTTTA TGGCGGGCGT CCTGCCCGCC ACCCTCCGGG CCGTTGCTTC
361 ACAACGTTCA AATCCGCTCC CGGCGGATTT GTCTACTCA GGAGAGCGTT CACCGACAAA
421 CAACAGATAA AACGAAAGGC CCAGTCTTCC GACTGAGCCT TTCGTTTTAT TTGATGCCTG
481 GCAGTTCCCT ACTCTCGCGT TAACGCTAGC ATGGATGTTT TCCCAGTCAC GACGTTGTAA
541 AACGACGGCC AGTCTTAAGC TCGGGCCCCA AATAATGATT TTATTTTGAC TGATAGTGAC
601 CTGTTGTTG CAACACATTG ATGAGCAATG CTTTTTTTATA ATGCCAACTT TGTACAAAAA
661 AGCAGGCTGA CTCACTATAG GGAGACCCAA GCTTAATGTA TGCTATACGA AGTTATTTTG
721 TTAAGTTGTT TATTGCAGCT TATAATGGTT ACAAATAAAG CAATAGCATC ACAAATTTCA
781 CAAATAAAGC ATTTTTTTTCA CTGCATTCTA GTTGTGGTTT GTCCAAACTC ATCAATGTAT
841 CTTATCATGT CTGGATCTTG TTAAGTTGTT TATTGCAGCT TATAATGGTT ACAAATAAAG
901 CAATAGCATC ACAAATTTCA CAAATAAAGC ATTTTTTTTCA CTGCATTCTA GTTGTGGTTT
961 GTCCAAACTC ATCAATGTAT CTTATCATGT CTGGATCTTG TTAAGTTGTT TATTGCAGCT
1021 TATAATGGTT ACAAATAAAG CAATAGCATC ACAAATTTCA CAAATAAAGC ATTTTTTTTCA
1081 CTGCATTCTA GTTGTGGTTT GTCCAAACTC ATCAATGTAT CTTATCATGT CTGGATCTGC
1141 AGATATAACT TCGTATAATG TATGCTATAC GAAGTTATTA ACTCGAGGTC ACGCGTTGAC
1201 ATTGATTATT GACTAGTTAT TAATAGTAAT CAATTACGGG GTCATTAGTT CATAGCCCAT
1261 ATATGGAGTT CCGCGTTACA TAACTTACGG TAAATGGCCC GCCTGGCTGA CCGCCCAACG
1321 ACCCCCGCCC ATTGACGTCA ATAATGACGT ATGTTCCCAT AGTAACGCCA ATAGGGACTT
1381 TCCATTGACG TCAATGGGTG GAGTATTTAC GGTAAACTGC CCACTTGGCA GTACATCAAG
1441 TGTATCATAT GCCAAGTACG CCCCCTATTG ACGTCAATGA CGGTAAATGG CCCGCCTGGC
1501 ATTATGCCCA GTACATGACC TTATGGGACT TTCCTACTTG GCAGTACATC TACGTATTAG
1561 TCATCGCTAT TACCATGGTG ATGCGGTTTT GGCAGTACAT CAATGGGCGT GGATAGCGGT
1621 TTGACTCACG GGGATTTCCA AGTCTCCACC CCATTGACGT CAATGGGAGT TTGTTTTGGC
1681 ACCAAAATCA ACGGGACTTT CCAAATGTC GTAACAACTC CGCCCCATTG ACGCAAATGG
1741 GCGGTAGGCG TGTACGGTGG GAGGTCTATA TAAGCAGAGC TCGTTTAGTG AACCCTCAGA
1801 TCGCCTGGAG ACGCCATCCA CGCTGTTTTG ACCTCCATAG AAGACACCGG GACCGATCCA
1861 GCCTCCGGAC TCTAGAGGAT CGAACCCTTG CCACCATGGA CAAAAAGTAT TCTATAGGTC
1921 TGGACATCGG TACAACTCG GTTGGATGGG CGGTCATCAC CGACGAGTAC AAAGTGCCGT
1981 CCAAGAAGTT CAAGGTGTTA GGCAACACCG ACCGGCATAG CATCAAGAAG AACCTCATCG
2041 GGGCCCTCCT GTTCGACAGC GGCAGACCG CGGAGGCGAC CAGGCTAAAG CGCACCGCCA
2101 GCGGCGGCTA CACCAGGCGC AAGAACAGGA TCTGCTACTT GCAAGAGATC TTCTCCAACG
2161 AGATGGCGAA GGTGACGAC AGCTTCTTCC ACCGCCTCGA GGAGTCCTTC CTCGTCGAGG
2221 AGGACAAGAA GCACGAGAGG CACCCCATCT TCGGCAACAT CGTCGACGAG GTGGCCTACC
2281 ACGAGAAGTA CCCCACCATC TACCACTTAC GCAAGAAGCT CGTCGACTCC ACCGACAAGG
2341 CGGACCTCCG GCTGATCTAC CTCGCACTGG CGCACATGAT CAAGTTTCTG GGCCACTTCC
2401 TCATCGAGGG CGACCTGAAC CCCGACAACA GCGACGTCGA CAAGTTGTTT ATCCAATCG
2461 TCCAGACTTA TAACCAGCTG TTCGAGGAGA ACCCCATCAA CGCAGCGGC GTCCGACGCCA
2521 AGGCGATCCT CTCCGCCCGC CTCAGCAAGT CCCGGCGCCT GGAGAACCTA ATCGCCCAAC
2581 TACCGGGCGA GAAGAAGAAC GGGCTGTTTC GGAACCTAAT CGCCCTCTCC CTCGGCCTCA
2641 CTCCCAACTT CAAGTCCAAC TTCGACCTCG CCGAGGACGC CAAGCTGCAA CTCTCCAAGG
2701 ACACCTATGA CGACGACTTA GACAACCTGC TCGCGCAGAT CGGCGACCAG TACGCCGACC
2761 TCTTCCTCGC CGCCAAGAAC CTGTCCGACG CCATCCTGCT CTCCGACATC TTGCGGGTCA
2821 ACACCGAGAT CACCAAGGCC CCGTTGTCCG CCTCCATGAT CAAGCGGTAT GACGAGCACC
2881 ACCAGGACCT CACCCTCCTG AAGGCCCTGG TCCGCCAGCA GCTCCCCGAG AAGTACAAGG
2941 AGATCTTCTT CGACCAGTCC AAGAACGGCT ACGCCGGCTA CATCGACGGG GGCGCCTCGC
3001 AGGAGGAGTT CTACAAGTTC ATCAAGCCCA TCTTAGAGAA GATGGACGGC ACCGAGGAGC
3061 TGCTCGTCAA GTTGAACAGG GAGGACCTCT TACGGAAGCA GCGCACTTTC GACAACGGGT
3121 CCATCCCGCA CCAGATCCAT CTCGGCGAGT TACACGCCAT CCTCCGGCGG CAGGAGGACT
3181 TCTACCCCTT CCTGAAGGAC AACAGGGAGA AGATCGAGAA GATCCTCACC TTCCGCATCC
3241 CCTACTACGT GGGCCCCCTC GCGAGGGGGA ACAGCAGGTT CGCCTGGATG ACCCGCAAGT
3301 CCGAGGAGAC CATCACTCCC TGGAAGTTTC AGGAGGTGGT CGACAAGGGC GCCTCCGCC
```

|      |             |             |             |             |            |             |
|------|-------------|-------------|-------------|-------------|------------|-------------|
| 3361 | AGTCCTTCAT  | CGAGCGGATG  | ACCAACTTCG  | ACAAGAACCT  | CCCCAACGAG | AAGGTCTTGC  |
| 3421 | CCAAGCACAG  | CCTCCTCTAC  | GAATACTTCA  | CGGTGTACAA  | CGAGCTCACC | AAGGTCAAGT  |
| 3481 | ACGTGACCGA  | GGGCATGCGC  | AAGCCCGCCT  | TCCTCTCCGG  | CGAGCAAAAG | AAGGCCATCG  |
| 3541 | TGGACCTGCT  | ATTCAAGACC  | AACCGCAAGG  | TCACTGTGAA  | GCAGCTGAAG | GAGGACTACT  |
| 3601 | TCAAGAAGAT  | CGAGTGCTTC  | GACAGCGTGG  | AGATCTCCGG  | CGTGGAGGAC | AGATTCAACG  |
| 3661 | CCTCCCTGGG  | CACTTATCAC  | GACCTCTTGA  | AGATCATCAA  | GGACAAGGAC | TTCTCTGACA  |
| 3721 | ACGAGGAGAA  | CGAGGACATC  | CTGGAGGACA  | TCGTGCTGAC  | CCTCACTCTG | TTGAGGAGCC  |
| 3781 | GCGAGATGAT  | CGAGGAGCGG  | CTCAAGACCT  | ACGCCCATCT  | ATTCGACGAC | AAGGTCATGA  |
| 3841 | AGCAACTCAA  | GAGGCGGAGG  | TACACTGGCT  | GGGGCAGGCT  | CTCCCGCAAG | CTCATCAACG  |
| 3901 | GGATCCGCGA  | CAAGCAGTCC  | GGGAAGACCA  | TCCTGGACTT  | CCTCAAGTCC | GACGGCTTCG  |
| 3961 | CCAACCGGAA  | CTTCATGCAA  | TTAATCCACG  | ACGACAGCCT  | CACCTTCAAG | GAGGACATCC  |
| 4021 | AAAAGGCCCA  | GGTCTCCGGC  | CAGGGGGACA  | GCCTGCACGA  | GCACATCGCC | AACCTGGCCG  |
| 4081 | GCTCGCCCGC  | CATCAAGAAG  | GGCATCCTGC  | AAACCGTCAA  | GGTGGTGGAC | GAGCTCGTCA  |
| 4141 | AGGTCATGGG  | GCGCCACAAG  | CCCGAGAACA  | TCGTGATCGA  | GATGGCCAGG | GAGAACCAAA  |
| 4201 | CCACCCAGAA  | GGGGCAAAAG  | AACTCGCGCG  | AGAGGATGAA  | GCGCATCGAG | GAGGGCATCA  |
| 4261 | AGGAGCTGGG  | CAGCCAAAATC | CTCAAGGAGC  | ACCCCGTGGG  | GAACACCCAG | CTCCAGAACG  |
| 4321 | AGAAGCTATA  | CCTATACTAC  | CTACAGAACG  | GCCGGGACAT  | GTACGTGAC  | CAGGAGTTAG  |
| 4381 | ACATCAACAG  | GCTGAGCGAC  | TACGACGTCG  | ACCATATCGT  | GCCCCAGAGC | TTCTCTAAGG  |
| 4441 | ACGACTCCAT  | AGATAACAAG  | GTCCTGACGA  | GGTCCGACAA  | GAACAGGGGC | AAGTCGGACA  |
| 4501 | ACGTGCCCAG  | CGAGGAGGTC  | GTCAAGAAGA  | TGAAGAATA   | CTGGCGGCAG | CTCTTGAACG  |
| 4561 | CCAAGCTGAT  | CACCCAGAGG  | AAGTTCGACA  | ACCTGACGAA  | GGCCGAGAGG | GGCGGCCTCA  |
| 4621 | GCGAGCTCGA  | CAAGGCCGGC  | TTCATCAAGC  | GGCAGCTCGT  | GGAGACCCGG | CAGATCACCA  |
| 4681 | AGCACGTCGC  | CCAGATCCTC  | GACAGCCGGA  | TGAACACCAA  | GTATGACGAG | AACGACAAGC  |
| 4741 | TCATCCGCGA  | GGTGAAGGTC  | ATCACTCTGA  | AGTCCAAGCT  | GGTGTCCGAC | TTCCGCAAGG  |
| 4801 | ACTTCCAGTT  | CTACAAGGTC  | AGGGAGATCA  | ACAACATATCA | CCACGCACAC | GATGCGTACT  |
| 4861 | TGAACGCCGT  | CGTGGGCACC  | GCCCTCATCA  | AGAAGTACCC  | CAAGCTCGAG | TCGGAGTTTCG |
| 4921 | TCTACGGCGA  | CTACAAGGTG  | TACGACGTGA  | GGAAGATGAT  | CGCCAAGTCC | GAGCAGGAGA  |
| 4981 | TCGGGAAGGC  | CACTGCCAAG  | TACTTCTTCT  | ATTCCAACAT  | CATGAACTTC | TTCAAGACCG  |
| 5041 | AGATCACCCCT | CGCCAACGGC  | GAGATCCGGA  | AGCGGCCCTT  | GATCGAGACC | AACGGGGAGA  |
| 5101 | CCGGCGAGAT  | CGTCTGGGAC  | AAGGGGCGCG  | ACTTCGCCAC  | CGTCCGGAAG | GTCTCTCTGA  |
| 5161 | TGCCGCAGGT  | CAACATCGTC  | AAGAAGACCG  | AGGTCCAAAC  | CGGGGGCTTC | TCGAAGGAGT  |
| 5221 | CCATCCTGCC  | CAAGCGGAAC  | TCGGACAAGC  | TCATCGCCAG  | GAAGAAGGAC | TGGGACCCCA  |
| 5281 | AGAAGTACGG  | CGGCTTCGAC  | AGCCCCACGG  | TCGCCTACTC  | CGTCTTGGTC | GTGGCCAAGG  |
| 5341 | TCGAGAAGGG  | GAAGTCGAAG  | AAGCTGAAGT  | CGGTGAAGGA  | GCTGTTGGGG | ATCACCATCA  |
| 5401 | TGGAGCGGAG  | CTCGTTCGAG  | AAGAACCCGA  | TCGACTTCCT  | GGAGGCCAAG | GGCTACAAGG  |
| 5461 | AGGTGAAGAA  | GGACCTGATC  | ATCAAGTTGC  | CCAAGTACAG  | CCTCTTCGAG | CTGGAGAACG  |
| 5521 | GCAGGAAGCG  | CATGTTAGCC  | AGCGCCGGCG  | AGCTGCAGAA  | GGGCAACGAG | TTAGCCTTAC  |
| 5581 | CCTCGAAGTA  | CGTCAACTTC  | CTGTACCTGG  | CCAGCCACTA  | CGAGAAGCTC | AAGGGCAGCC  |
| 5641 | CCGAGGACAA  | CGAGCAAAAG  | CAACTCTTCG  | TCGAGCAACA  | CAAGCACTAC | CTGGACGAGA  |
| 5701 | TCATCGAGCA  | GATCAGCGAG  | TTCTCCAAGA  | GGGTGATCCT  | GGCCGACGCC | AACCTGGACA  |
| 5761 | AGGTGCTCAG  | CGCCTACAAC  | AAGCACCGGG  | ACAAGCCCAT  | CAGGGAGCAG | GCCGAGAACA  |
| 5821 | TCATCCACCT  | GTTACGCTC   | ACGAACCTCG  | GCGCCCCGGC  | CGCCTTCAAG | TACTTCGACA  |
| 5881 | CCACCATCGA  | CAGGAAGCGC  | TACACGTCCA  | CCAAGGAGGT  | GCTGGACGCC | ACCTCATCC   |
| 5941 | ACCAAGTCAT  | CACCGGCCTC  | TACGAGACCC  | GGATCGACCT  | CAGCCAATTG | GGCGGCGACA  |
| 6001 | GCAGGGTGAT  | CCCCAAGAAA  | AAGAGAAAG   | TCTGATAAAA  | GGGTTCGATC | CCTACCGGTT  |
| 6061 | AGTAATGAGT  | TTAAACGGGG  | GAGGCTAACT  | GAAACACGGA  | AGGAGACAAT | ACCGGAAGGA  |
| 6121 | ACCCGCGCTA  | TGACGGCAAT  | AAAAAGACAG  | AATAAAACGC  | ACGGGTGTTG | GGTCGTTTGT  |
| 6181 | TCATAAACGC  | GGGGTTCGGT  | CCCAGGGCTG  | GCACTCTGTC  | GATACCCCA  | CGAGACCCCA  |
| 6241 | TTGGGGCCAA  | TACGCCCCGC  | TTTCTTCCTT  | TTCCCCACCC  | CACCCCCCA  | GTTCGGGTGA  |
| 6301 | AGGCCAGGG   | CTCGCAGCCA  | ACGTCGGGGC  | GGCAGGCCCT  | GCCATAGCAG | ATCTGCGCAG  |
| 6361 | CTGGGGCTCT  | AGGGGGTATC  | CCCACGCGCC  | CTGTCTCGAG  | CATGCATCTA | GAGGGCCCTA  |
| 6421 | TTCTATAGTG  | TCACCTAAAT  | GCTAGAGCTC  | GCTGATCAGC  | CTCGACTGTG | CCTTCTAGTT  |
| 6481 | GCCAGCCATC  | ACCCAGCTTT  | CTTGTACAAA  | GTTGGCATT   | TAAGAAAGCA | TTGCTTATCA  |
| 6541 | ATTTGTTGCA  | ACGAACAGGT  | CACATATCAGT | CAAAAATAAAA | TCATTATTTG | CCATCCAGCT  |
| 6601 | GATATCCCTT  | ATAGTGAGTC  | GTATTACATG  | GTCATAGCTG  | TTTCCTGGCA | GCTCTGGCCC  |
| 6661 | GTGTCTCAAA  | ATCTCTGATG  | TTACATTGCA  | CAAGATAAAA  | TAATATCATC | ATGAACAATA  |
| 6721 | AAACTGTCTG  | CTTACATAAA  | CAGTAATACA  | AGGGGTGTTA  | TGAGCCATAT | TCAACGGGAA  |
| 6781 | ACGTCGAGGC  | CGCGATTAAA  | TTCCAACATG  | GATGCTGATT  | TATATGGGTA | TAAATGGGCT  |
| 6841 | CGCGATAATG  | TCGGGCAATC  | AGGTGCGACA  | ATCTATCGCT  | TGTATGGGAA | GCCCGATGCG  |
| 6901 | CCAGAGTTGT  | TTCTGAAACA  | TGGCAAAGGT  | AGCGTTGCCA  | ATGATGTTAC | AGATGAGATG  |

|      |             |             |            |            |             |             |
|------|-------------|-------------|------------|------------|-------------|-------------|
| 6961 | GTCAGACTAA  | ACTGGCTGAC  | GGAATTTATG | CCTCTTCCGA | CCATCAAGCA  | TTTTATCCGT  |
| 7021 | ACTCCTGATG  | ATGCATGGTT  | ACTCACCAC  | GCGATCCCCG | GAAAAACAGC  | ATTCCAGGTA  |
| 7081 | TTAGAAGAAT  | ATCCTGATTC  | AGGTGAAAAT | ATTGTTGATG | CGCTGGCAGT  | GTTCCCTGCGC |
| 7141 | CGGTTGCATT  | CGATTCCCTGT | TTGTAATTGT | CCTTTTAACA | GCGATCGCGT  | ATTTTCGTCTC |
| 7201 | GCTCAGGCGC  | AATCACGAAT  | GAATAACGGT | TTGGTTGATG | CGAGTGATTT  | TGATGACGAG  |
| 7261 | CGTAATGGCT  | GGCCTGTTGA  | ACAAGTCTGG | AAAGAAATGC | ATAAACTTTT  | GCCATTCTCA  |
| 7321 | CCGATTTCAG  | TCGTCACTCA  | TGGTGATTTT | TCACTTGATA | ACCTTATTTT  | TGACGAGGGG  |
| 7381 | AAATTAATAG  | GTTGTATTGA  | TGTTGGACGA | GTCGGAATCG | CAGACCGATA  | CCAGGATCTT  |
| 7441 | GCCATCCTAT  | GGAAGTGCCT  | CGGTGAGTTT | TCTCCTTCAT | TACAGAAACG  | GCTTTTTCAA  |
| 7501 | AAATATGGTA  | TTGATAATCC  | TGATATGAAT | AAATTGCAGT | TTCATTTGAT  | GCTCGATGAG  |
| 7561 | TTTTTCTAAT  | CAGAATTGGT  | TAATTGGTTG | TAACACTGGC | AGAGCATTAC  | GCTGACTTGA  |
| 7621 | CGGGACGGCG  | CAAGCTCATG  | ACCAAAATCC | CTTAACGTGA | GTTACGCGTC  | GTTCCACTGA  |
| 7681 | GCGTCAGACC  | CCGTAGAAAA  | GATCAAAGGA | TCTTCTTGAG | ATCCTTTTTT  | TCTGCGCGTA  |
| 7741 | ATCTGCTGCT  | TGCAAAACAAA | AAAACCACCG | CTACCAGCGG | TGGTTTGT    | GCCGGATCAA  |
| 7801 | GAGCTACCAA  | CTCTTTTTTCC | GAAGGTAAC  | GGCTTCAGCA | GAGCGCAGAT  | ACCAAATACT  |
| 7861 | GTTCTTCTAG  | TGTAGCCGTA  | GTTAGGCCAC | CACTTCAAGA | ACTCTGTAGC  | ACCGCCTACA  |
| 7921 | TACCTCGCTC  | TGCTAATCCT  | GTTACCAGTG | GCTGCTGCCA | GTGGCGATAA  | GTCGTGTCTT  |
| 7981 | ACCGGGTTGG  | ACTCAAGACG  | ATAGTTACCG | GATAAGGCGC | AGCGGTCGGG  | CTGAACGGGG  |
| 8041 | GGTTCGTGCA  | CACAGCCCAG  | CTTGAGCGA  | ACGACCTACA | CCGAACTGAG  | ATACCTACAG  |
| 8101 | CGTGAGCTAT  | GAGAAAGCGC  | CACGCTTCCC | GAAGGGAGAA | AGGCGGACAG  | GTATCCGGTA  |
| 8161 | AGCGGCAGGG  | TCGGAACAGG  | AGAGCGCACG | AGGGAGCTTC | CAGGGGGAAA  | CGCCTGGTAT  |
| 8221 | CTTTATAGTC  | CTGTGCGGGT  | TCGCCACCTC | TGACTTGAGC | GTCGATTTTT  | GTGATGCTCG  |
| 8281 | TCAGGGGGGC  | GGAGCCTATG  | GAAAAACGCC | AGCAACGCGG | CCTTTTTTACG | GTTCCCTGGCC |
| 8341 | TTTGTGCTGGC | CTTTTGCTCA  | CATGTT     |            |             |             |

//
