# Supplementary material for: CRISPR/Cas9 Knock-Out in Primary Neonatal and Adult Cardiomyocytes Reveals Distinct cAMP Dynamics Regulation by Various PDE2A and PDE3A Isoforms
Source: MDPI journal article supplement (doi:10.3390/cells12111543), 2023-06-04
Supplement: s1 [file s1]

|          |                     |         |     |        |             |
|----------|---------------------|---------|-----|--------|-------------|
| LOCUS    | pDNR221_U6gRNA      | 5189 bp | DNA | linear | 06-APR-2023 |
| FEATURES | Location/Qualifiers |         |     |        |             |

|                |            |                                                                                                                                                                                                                                                                                    |
|----------------|------------|------------------------------------------------------------------------------------------------------------------------------------------------------------------------------------------------------------------------------------------------------------------------------------|
| rep_origin     | 4..677     | /note="ColE1 (pUC-type) origin of replication"                                                                                                                                                                                                                                     |
| gene           | 798..1607  | /note="kanamycin resistance gene"                                                                                                                                                                                                                                                  |
| misc_feature   | 1777..1876 | /note="attL2"                                                                                                                                                                                                                                                                      |
| promoter       | 1986..2249 | /label=hU6_promoter                                                                                                                                                                                                                                                                |
| misc_feature   | 2252..2257 | /label=BbsI                                                                                                                                                                                                                                                                        |
| gene           | 2416..2595 | /gene="lacZ"                                                                                                                                                                                                                                                                       |
| CDS            | 2259..2595 | /gene="lacZ"                                                                                                                                                                                                                                                                       |
|                |            | /note="beta-d-galactosidase"                                                                                                                                                                                                                                                       |
| misc_feature   | 2617..2622 | /label=BbsI(1)                                                                                                                                                                                                                                                                     |
| misc_structure | 2625..2701 | /note="gRNA"                                                                                                                                                                                                                                                                       |
| terminator     | 2702..2707 | /note=""                                                                                                                                                                                                                                                                           |
| enhancer       | 2755..3134 | /label=CMV enhancer                                                                                                                                                                                                                                                                |
|                |            | /note="human cytomegalovirus immediate early enhancer"                                                                                                                                                                                                                             |
| promoter       | 3135..3382 | /label=CMV promoter                                                                                                                                                                                                                                                                |
|                |            | /note="human cytomegalovirus (CMV) immediate early promoter"                                                                                                                                                                                                                       |
| CDS            | 3475..4209 | /dnas_title="mMaroon1"                                                                                                                                                                                                                                                             |
|                |            | /codon_start=1                                                                                                                                                                                                                                                                     |
|                |            | /product="bright, rapidly maturing, monomeric far-red fluorescent protein (Bajar et al., 2016)"                                                                                                                                                                                    |
|                |            | /label=mMaroon1                                                                                                                                                                                                                                                                    |
|                |            | /translation="MVSKGEELIKENMHTKLYLTGTVNNHYFECTAEEGEGKPYEGTQT<br>NRIKVVVRGGPLPFAFDILAPCFMYGSKTFINHPPDIPDYFKQSFPEGFTWERTTVYED<br>GGTLTATQDTSIQDGLIYNVQVRGENFPSNGPVMQKKTGWEASTETLYPADGSLEG<br>RLDWALKLVGGGHLHCRLETTYRSKKPAKNLKMGPVYFIDRRLERIKEADNETYVEQH<br>EVAVARYCDLPSKLGHLNGMDELYK" |
| polyA_signal   | 4248..4472 | /label=bGH poly(A) signal                                                                                                                                                                                                                                                          |
|                |            | /note="bovine growth hormone polyadenylation signal"                                                                                                                                                                                                                               |
| misc_feature   | 4522..4621 | /note="aatL1"                                                                                                                                                                                                                                                                      |

# ORIGIN

|     |            |            |            |            |            |            |
|-----|------------|------------|------------|------------|------------|------------|
| 1   | AACATGTGAG | CAAAAGGCCA | GCAAAGGCC  | AGGAACCGTA | AAAAGGCCGC | GTTGCTGGCG |
| 61  | TTTTTCCATA | GGCTCCGCCC | CCCTGACGAG | CATCACAAAA | ATCGACGCTC | AAGTCAGAGG |
| 121 | TGGCGAAACC | CGACAGGACT | ATAAAGATAC | CAGGCGTTTC | CCCCTGGAAG | CTCCCTCGTG |
| 181 | CGCTCTCCTG | TTCCGACCCT | GCCGCTTACC | GGATACCTGT | CCGCTTTTCT | CCCTTCGGGA |
| 241 | AGCGTGGCGC | TTTCTCATAG | CTCAGCTGT  | AGGTATCTCA | GTTCGGTGTA | GGTCGTTTCG |
| 301 | TCCAAGCTGG | GCTGTGTGCA | CGAACCCCC  | GTTCAGCCCG | ACCGCTGCGC | CTTATCCGGT |
| 361 | AACTATCGTC | TTGAGTCCAA | CCCGGTAAGA | CACGACTTAT | CGCCACTGGC | AGCAGCCACT |
| 421 | GGTAACAGGA | TTAGCAGAGC | GAGGTATGTA | GGCGGTGCTA | CAGAGTTCTT | GAAGTGGTGG |
| 481 | CCTAACTACG | GCTACACTAG | AAGAACAGTA | TTTGGTATCT | GCGCTCTGCT | GAAGCCAGTT |
| 541 | ACCTTCGGAA | AAAGAGTTGG | TAGCTCTTGA | TCCGGCAAAC | AAACCACCGC | TGGTAGCGGT |
| 601 | GGTTTTTTTG | TTTGCAAGCA | GCAGATTACG | CGCAGAAAAA | AAGGATCTCA | AGAAGATCCT |

|      |            |             |             |             |             |            |
|------|------------|-------------|-------------|-------------|-------------|------------|
| 661  | TTGATCTTTT | CTACGGGGTC  | TGACGCTCAG  | TGGAACGACG  | CGTAACTCAC  | GTTAAGGGAT |
| 721  | TTTGGTCATG | AGCTTGCGCC  | GTCCCGTCAA  | GTCAGCGTAA  | TGCTCTGCCA  | GTGTTACAAC |
| 781  | CAATTAACCA | ATTCTGATTA  | GAAAAACTCA  | TCGAGCATCA  | AATGAAACTG  | CAATTTATTC |
| 841  | ATATCAGGAT | TATCAATACC  | ATATTTTTGA  | AAAAGCCGTT  | TCTGTAATGA  | AGGAGAAAAC |
| 901  | TCACCGAGGC | AGTTCCATAG  | GATGGCAAGA  | TCCTGGTATC  | GGTCTGCGAT  | TCCGACTCGT |
| 961  | CCAACATCAA | TACAACCTAT  | TAATTTCCCC  | TCGTCAAAAA  | TAAGGTTATC  | AAGTGAGAAA |
| 1021 | TCACCATGAG | TGACGACTGA  | ATCCGGTGAG  | AATGGCAAAA  | GTTTATGCAT  | TTCTTTCCAG |
| 1081 | ACTTGTTCAA | CAGGCCAGCC  | ATTACGCTCG  | TCATCAAAAT  | CACTCGCATC  | AACCAAACCG |
| 1141 | TTATTCATTC | GTGATTGCGC  | CTGAGCGAGA  | CGAAATACGC  | GATCGCTGTT  | AAAAGGACAA |
| 1201 | TTACAAACAG | GAATCGAATG  | CAACCGGCGC  | AGGAACACTG  | CCAGCGCATC  | AACAATATTT |
| 1261 | TCACCTGAAT | CAGGATATTC  | TTCTAATACC  | TGGAATGCTG  | TTTTTCCGGG  | GATCGCAGTG |
| 1321 | GTGAGTAACC | ATGCATCATC  | AGGAGTACGG  | ATAAAATGCT  | TGATGGTCGG  | AAGAGGCATA |
| 1381 | AATTCCGTCA | GCCAGTTTAT  | TCTGACCATC  | TCATCTGTAA  | CATCATTGGC  | AACGCTACCT |
| 1441 | TTGCCATGTT | TCAGAAAACAA | CTCTGGCGCA  | TCGGGCTTCC  | CATACAAGCG  | ATAGATTGTC |
| 1501 | GCACCTGATT | GCCCCGACATT | ATCGCGAGCC  | CATTTATACC  | CATATAAATC  | AGCATCCATG |
| 1561 | TTGGAATTTA | ATCGCGGCCT  | CGACGTTTCC  | CGTTGAATAT  | GGCTCATAAC  | ACCCCTTGTA |
| 1621 | TTACTGTTTA | TGTAAGCAGA  | CAGTTTTATT  | GTTTCATGAT  | ATATTATTTT  | ATCTTGTGCA |
| 1681 | ATGTAACATC | AGAGATTTTG  | AGACACGGGC  | CAGAGCTGCC  | AGGAAACAGC  | TATGACCATG |
| 1741 | TAATACGACT | CACTATAGGG  | GATATCAGCT  | GGATGGCAAA  | TAATGATTTT  | ATTTTGACTG |
| 1801 | ATAGTGACCT | GTTCGTTGCA  | ACAAATTGAT  | AAGCAATGCT  | TTCTTATAAT  | GCCAACTTTG |
| 1861 | TACAAGAAAG | CTGGGTGATG  | GCTGGCAACT  | AGAAGGCACA  | GTCGAGGCTG  | ATCAGCGAGC |
| 1921 | TCTAGCATTT | AGGTGACACT  | ATAGAATAGG  | GCCCTCTAGA  | TGCATGCTCG  | ACTGGATCCG |
| 1981 | GTACCAAGGT | CGGGCAGGAA  | GAGGGCCTAT  | TTCCCATGAT  | TCCTTCATAT  | TTGCATATAC |
| 2041 | GATACAAGGC | TGTTAGAGAG  | ATAATTAGAA  | TTAATTTGAC  | TGTAAACACA  | AAGATATTAG |
| 2101 | TACAAAATAC | GTGACGTAGA  | AAGTAATAAT  | TTCTTGGGTA  | GTTTGCAGTT  | TTAAAATTAT |
| 2161 | GTTTTAAAAT | GGACTATCAT  | ATGCTTACCG  | TAACTTGAAA  | GTATTTTCGAT | TTCTTGGCTT |
| 2221 | TATATATCTT | GTGGAAAGGA  | CGAAACACCG  | GGTCTTCGCA  | CGACAGGTTT  | CCCGACTGGA |
| 2281 | AAGCGGGCAG | TGAGCGCAAC  | GCAATTAATG  | TGAGTTAGCT  | CACTCATTAG  | GCACCCCAGG |
| 2341 | CTTTACACTT | TATGCTTCCG  | GCTCGTATGT  | TGTGTGGAAT  | TGTGAGCGGA  | TAACAATTTT |
| 2401 | ACACAGGAAA | CAGCTATGAC  | CATGATTACG  | GATTCACCTG  | CCGTCGTTTT  | ACAACGTCGT |
| 2461 | GACTGGGAAA | ACCCTGGCGT  | TACCCAACTT  | AATCGCCTTG  | CAGCACATCC  | CCCTTTCGCC |
| 2521 | AGCTGGCGTA | ATAGCGAAGA  | GGCCCGCACC  | GATCGCCCTT  | CCCAACAGTT  | GCGCAGCCTG |
| 2581 | AATGGCGAAT | GGCGCGAACG  | ATATCGTGCG  | GATCCAGAAG  | ACCTGTTTTA  | GAGCTAGAAA |
| 2641 | TAGCAAGTTA | AAATAAGGCT  | AGTCCGTTAT  | CAACTTGAAA  | AAGTGGCACC  | GAGTCGGTGC |
| 2701 | TTTTTTTCTA | GACCCAGCTT  | TCTTGTAACA  | AGTTGGCATT  | AAAGGGCGAA  | TTCTGACATT |
| 2761 | GATTATTGAC | TAGTTATTAA  | TAGTAATCAA  | TTACGGGGTC  | ATTAGTTCAT  | AGCCCATATA |
| 2821 | TGGAGTTCCG | CGTTACATAA  | CTTACGGTAA  | ATGGCCCCGC  | TGGCTGACCG  | CCCAACGACC |
| 2881 | CCCGCCCAT  | GACGTCAATA  | ATGACGTATG  | TTCCCATAGT  | AACGCCAATA  | GGGACTTTCC |
| 2941 | ATTGACGTCA | ATGGGTGGAC  | TATTTACGGT  | AACTGCCCCA  | CTTGGCAGTA  | CATCAAGTGT |
| 3001 | ATCATATGCC | AAGTACGCCC  | CCTATTGACG  | TCAATGACGG  | TAAATGGCCC  | GCCTGGCATT |
| 3061 | ATGCCCAGTA | CATGACCTTA  | TGGGACTTTC  | CTACTTGCCA  | GTACATCTAC  | GTATTAGTCA |
| 3121 | TCGCTATTAC | CATGGTGATG  | CGGTTTTGGC  | AGTACATCAA  | TGGGCGTGGA  | TAGCGGTTTG |
| 3181 | ACTCACGGGG | ATTTCCAAGT  | CTCCACCCCA  | TTGACGTCAA  | TGGGAGTTTG  | TTTTGGCACC |
| 3241 | AAAATCAACG | GGACTTTCCA  | AAATGTCGTA  | ACAACTCCGC  | CCCATTGACG  | CAAATGGGCG |
| 3301 | GTAGGCGTGT | ACGGTGGGAG  | GTCTATATAA  | GCAGAGCTCT  | CTGGCTAACT  | AGAGAAACCC |
| 3361 | CTGCTTACTG | GCTTATCGAA  | ATAGACCCGC  | TCGTTGCAAC  | AAATTGATGA  | GCAATGCTTT |
| 3421 | TTTATAATGC | CAACTCTGTA  | CAAAAAAGTT  | GGCGAGGATC  | GAACCCTTGC  | CACCATGGTG |
| 3481 | AGCAAGGGCG | AGGAGCTGAT  | CAAGGAGAAC  | ATGCACACCA  | AGCTGTACCT  | GACAGGCACC |
| 3541 | GTGAACAACC | ACTACTTCGA  | ATGCACCGCC  | GAAGGGGAGG  | GCAAGCCCTA  | CGAGGGCACC |
| 3601 | CAGACCAACA | GGATCAAGGT  | GGTGCGCGGA  | GGCCCCCTGC  | CGTTTCGCATT | CGACATCCTG |
| 3661 | CCCCCTGCT  | TTATGTACGG  | GAGCAAGACC  | TTCATTTAACC | ATCCACCTGA  | CATTCCCGAT |
| 3721 | TATTTTAAGC | AGTCCTTCCC  | TGAGGGCTTC  | ACATGGGAGA  | GAACCACCGT  | TTACGAAGAT |
| 3781 | GGGGGCACAC | TCACTGCTAC  | ACAGGACACC  | AGCCTCCAGG  | ACGGCTGCCT  | GATCTACAAC |
| 3841 | GTCCAAGTCA | GAGGGGAGAA  | CTTCCCATCC  | AACGGCCCTG  | TGATGCAGAA  | GAAAACACTC |
| 3901 | GGCTGGGAGG | CCAGTACCGA  | GACCCTGTAC  | CCCGCTGACG  | GCAGCCTGGA  | AGGCAGACTG |
| 3961 | GACTGGGCCC | TGAAGCTCGT  | GGGCGGGGGC  | CACCTGCACT  | GCAGACTGGA  | AACCACATAC |
| 4021 | AGATCCAAGA | AACCCGCAAA  | GAACCTCAAG  | ATGCCCGGCG  | TCTATTTTAT  | TGACAGGAGA |
| 4081 | CTGGAAAGAA | TCAAGGAGGC  | CGACAATGAG  | ACCTACGTCG  | AGCAGCACGA  | GGTGGCTGTG |
| 4141 | GCCAGATACT | GCGACCTCCC  | TAGCAAACCTG | GGGCACAAAC  | TTAATGGCAT  | GGACGAGCTG |
| 4201 | TACAAGTAAT | CTAGAGGGCT  | ATGCTAGAGC  | TCGCTGATCA  | GCCTCGACTG  | TGCCTTCTAG |

|      |             |            |            |            |            |            |
|------|-------------|------------|------------|------------|------------|------------|
| 4261 | TTGCCAGCCA  | TCTGTTGTTT | GCCCCCTCCC | CGTGCCTTCC | TTGACCCTGG | AAGGTGCCAC |
| 4321 | TCCCACGTGC  | CTTTCCTAAT | AAAATGAGGA | AATTGCATCG | CATTGTCTGA | GTAGGTGTCA |
| 4381 | TTCTATTCTG  | GGGGGTGGGG | TGGGGCAGGA | CAGCAAGGGG | GAGGATTGGT | AAGACAATAG |
| 4441 | CAGGCATGCT  | GGGGATGCGG | TGGGCTCTAT | GGCTTCTGAG | GCGGAAAGAA | CCAGCAAGCT |
| 4501 | TGGGTCTCCC  | TATAGTGAGT | CAGCCTGCTT | TTTTGTACAA | AGTTGGCATT | ATAAAAAAGC |
| 4561 | ATTGCTCATC  | AATGTGTTGC | AACGAACAGG | TCACTATCAG | TCAAAATAAA | ATCATTATTT |
| 4621 | GGGGCCCCGAG | CTTAAGACTG | GCCGTCGTTT | TACAACGTCG | TGACTGGGAA | AACATCCATG |
| 4681 | CTAGCGTTAA  | CGCGAGAGTA | GGGAACTGCC | AGGCATCAAA | TAAAACGAAA | GGCTCAGTCG |
| 4741 | GAAGACTGGG  | CCTTTCGTTT | TATCTGTTGT | TTGTCGGTGA | ACGCTCTCCT | GAGTAGGACA |
| 4801 | AATCCGCCGG  | GAGCGGATTT | GAACGTTGTG | AAGCAACGGC | CCGGAGGGTG | GCGGGCAGGA |
| 4861 | CGCCCGCCAT  | AAACTGCCAG | GCATCAAAC  | AAGCAGAAGG | CCATCCTGAC | GGATGGCCTT |
| 4921 | TTTGCGTTTC  | TACAAACTCT | TCCTGGCTAG | CGGTACGCGT | ATTAATTGCG | TTGCGCTCAC |
| 4981 | TGCCCGCTTT  | CCAGTCGGGA | AACCTGTCGT | GCCAGCTGCA | TTAATGAATC | GGCCAACGCG |
| 5041 | CGGGGAGAGG  | CGGTTTGCGT | ATTGGGCGCT | CTTCCGCTTC | CTCGCTCACT | GACTCGCTGC |
| 5101 | GCTCGGTCGT  | TCGGCTGCGG | CGAGCGGTAT | CAGCTCACTC | AAAGGCGGTA | ATACGGTTAT |
| 5161 | CCACAGAATC  | AGGGGATAAC | GCAGGAAAG  |            |            |            |

//
